# Supplementary material for: (+)-Lipoic Acid Reduces Lipotoxicity and Regulates Mitochondrial Homeostasis and Energy Balance in an In Vitro Model of Liver Steatosis
Source: MDPI journal article supplement (doi:10.3390/ijms241914491), 2023-09-23
Supplement: s1 [file s1]

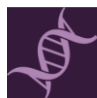

Article

# (+)-Lipoic Acid Reduces Lipotoxicity and Regulates Mitochondrial Homeostasis and Energy Balance in an In Vitro Model of Liver Steatosis

Lucia Longhitano <sup>1†</sup>, Alfio Distefano <sup>1†</sup>, Angela Maria Amorini <sup>1</sup>, Laura Orlando <sup>1</sup>, Sebastiano Giallongo <sup>1</sup>, Daniele Tibullo <sup>1</sup>, Giuseppe Lazzarino <sup>1</sup>, Anna Nicolosi <sup>2</sup>, Amer M. Alanazi <sup>3</sup>, Concetta Saoca <sup>4</sup>, Vincenzo Macaione <sup>4</sup>, M'hammed Aguenouz <sup>4</sup>, Federico Salomone <sup>5</sup>, Emanuela Tropea <sup>1</sup>, Ignazio Alberto Barbagallo <sup>1</sup>, Giovanni Li Volti <sup>1,\*</sup> and Giacomo Lazzarino <sup>6</sup>

<sup>1</sup> Department of Biomedical and Biotechnological Sciences, University of Catania, 95123 Catania, Italy; (L.L.) lucia.longhitano@unict.it; (A.D.) distalfio@gmail.com; (A.M.) amorini@unict.it; (L.O.) lauraorlando2810@gmail.com; (S.G.) sebastiano.giall@gmail.com; (D.T.) d.tibullo@unict.it; (G.L.) lazzarig@unict.it; (E.T.) tropeaem Manuela3@gmail.com; (I.A.B.) ignazio.barbagallo@unict.it; (G.L.V.) livolti@unict.it;

<sup>2</sup> Hospital Pharmacy Unit, Ospedale Cannizzaro, 95125 Catania, Italy; (A.N.) annanicolosi@hotmail.com;

<sup>3</sup> Pharmaceutical Biotechnology Laboratory, Department of Pharmaceutical Chemistry, College of Pharmacy, King Saud University, Riyadh 11451, Saudi Arabia; (A.M.A.) amalanazi@ksu.edu.sa

<sup>4</sup> Depart. Clinical and Experimental Medicine, University of Messina Via Consolare Valeria 1 98125 Messina; (M.A.) aguenoz.mhomed@unime.it; (C.S.) saoca.concetta@unime.it; (V.M.) vincenzo.macaione@unime.it

<sup>5</sup> Division of Gastroenterology, Ospedale di Acireale, Azienda Sanitaria Provinciale di Catania, Catania, Italy; (F.S.) federicosalomone@rocketmail.com

<sup>6</sup> UniCamillus-Saint Camillus International University of Health Sciences, Via di Sant'Alessandro 8, 00131 Rome, Italy; (G.L.V.) Giacomo.lazzarino@unicamillus.org

† These authors contribute equally to the manuscript.

\* Correspondence: livolti@unict.it

## Supplementary Materials

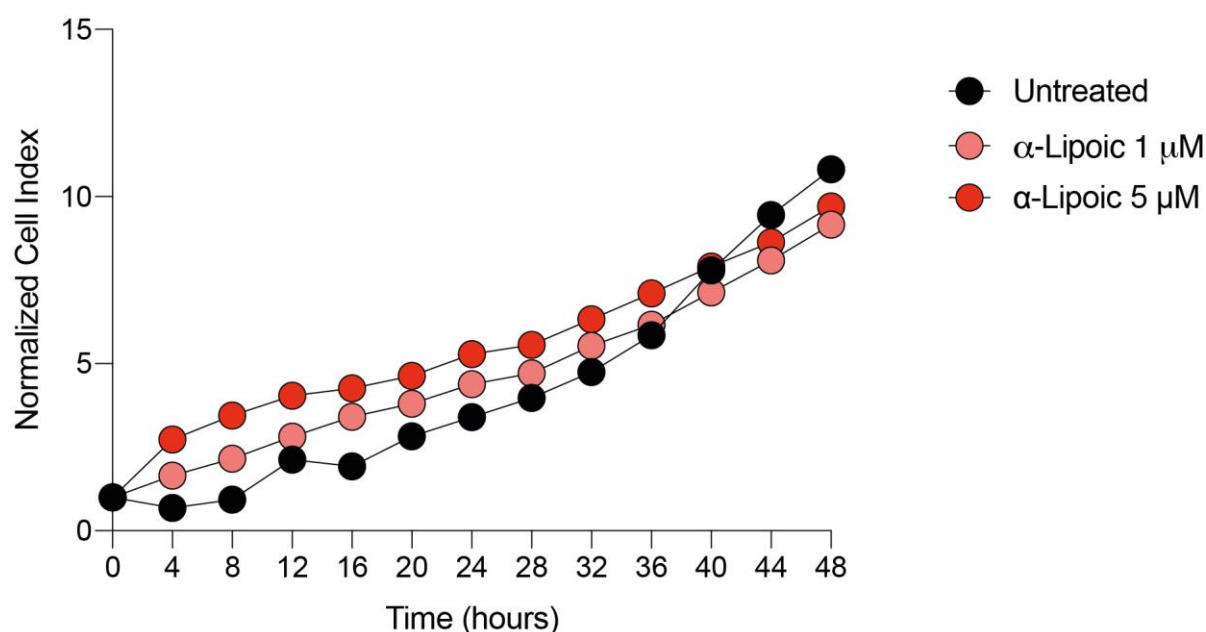

Figure S1.

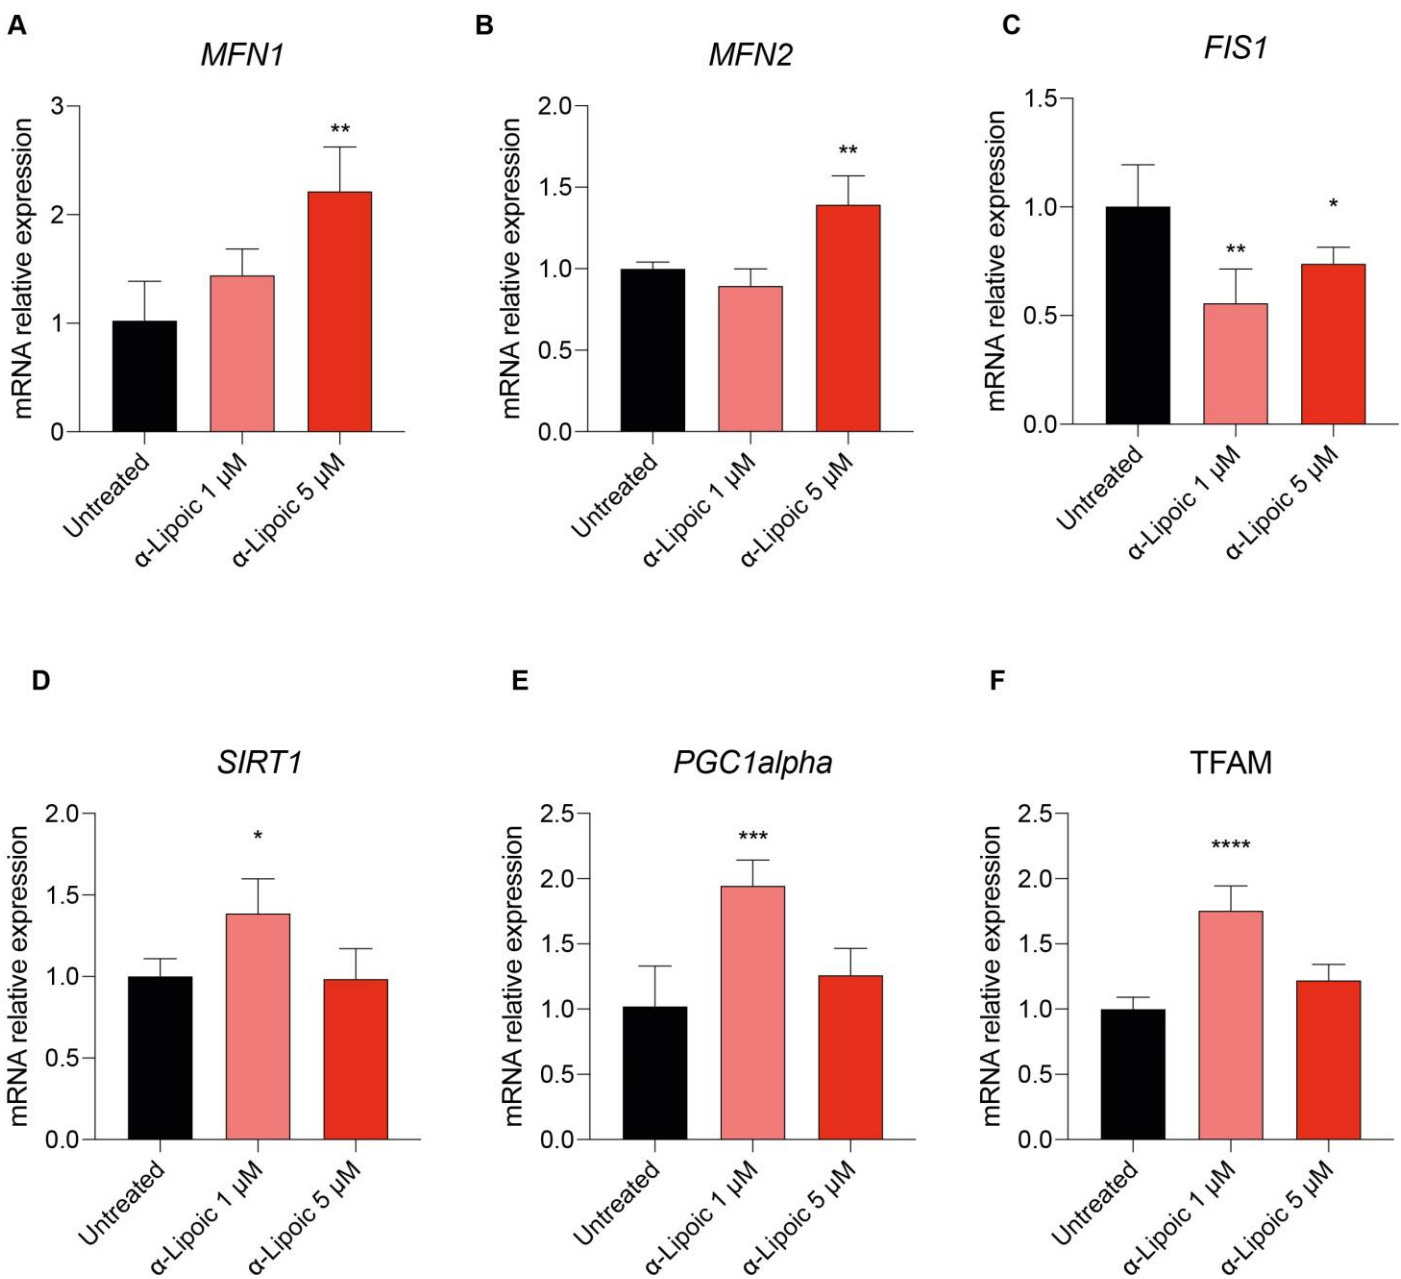

Figure S2.

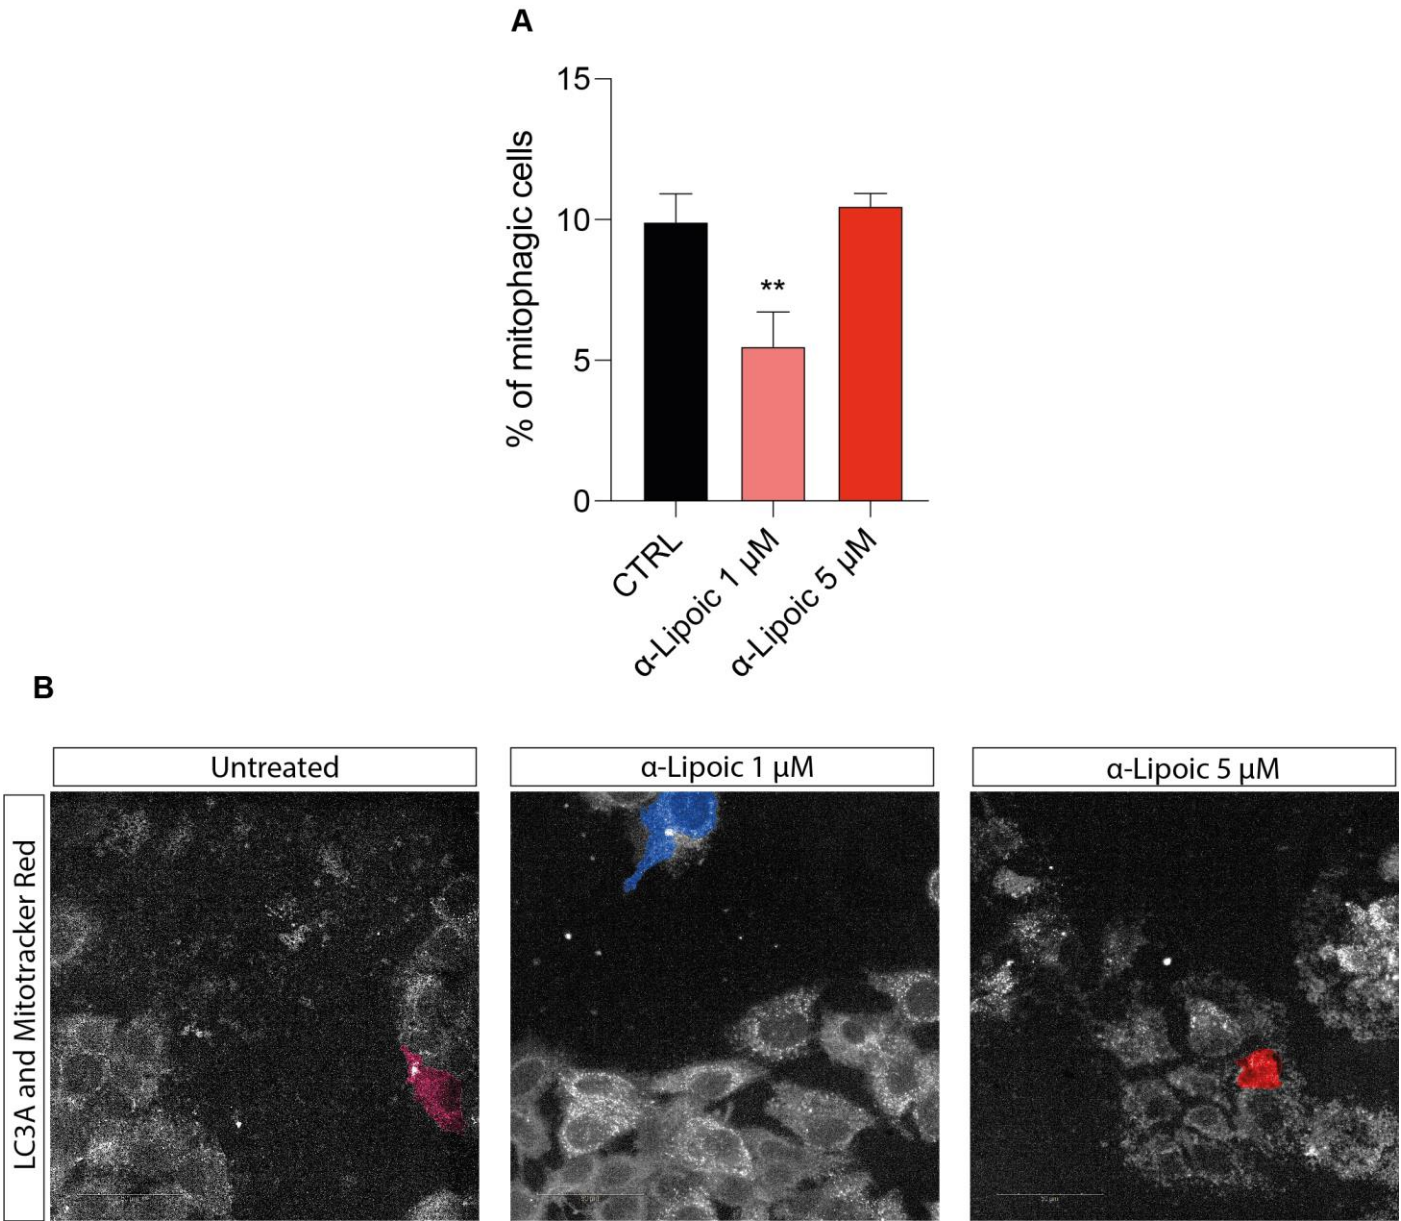

Figure S3.

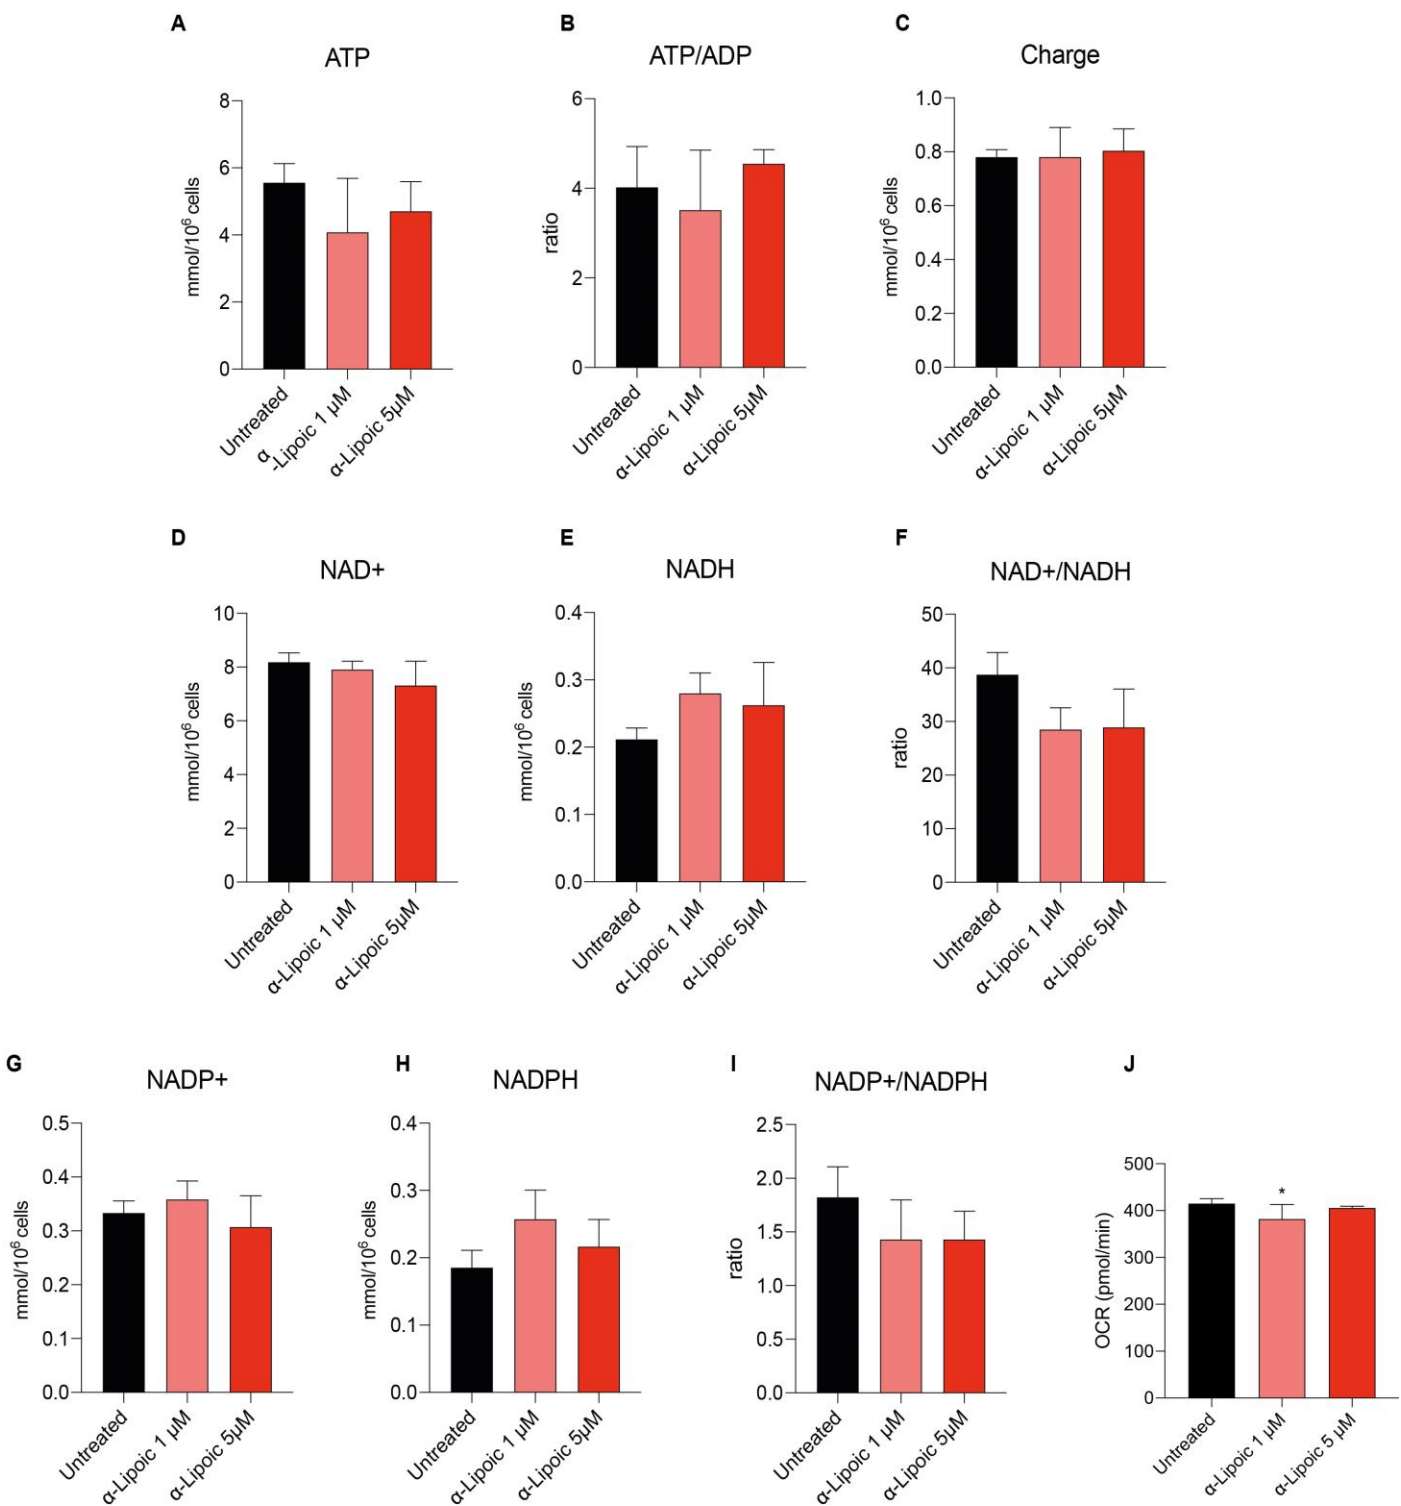

Figure S4.
